# Supplementary material for: Intertumoral heterogeneity in patient-specific drug sensitivities in treatment-naïve glioblastoma
Source: PubMed Central journal article supplement (PMC6593575; doi:10.1186/s12885-019-5861-4), 2019-06-25
Supplement: 12885_2019_5861_MOESM8_ESM.pdf [file 12885_2019_5861_MOESM8_ESM.pdf]

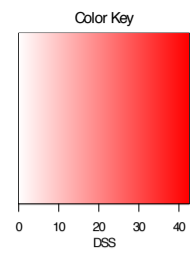

CTG DSS Heatmap 461 Drugs  
(rdist=spearman and rclust = ward, cdist = manhattan and cclust = ward)

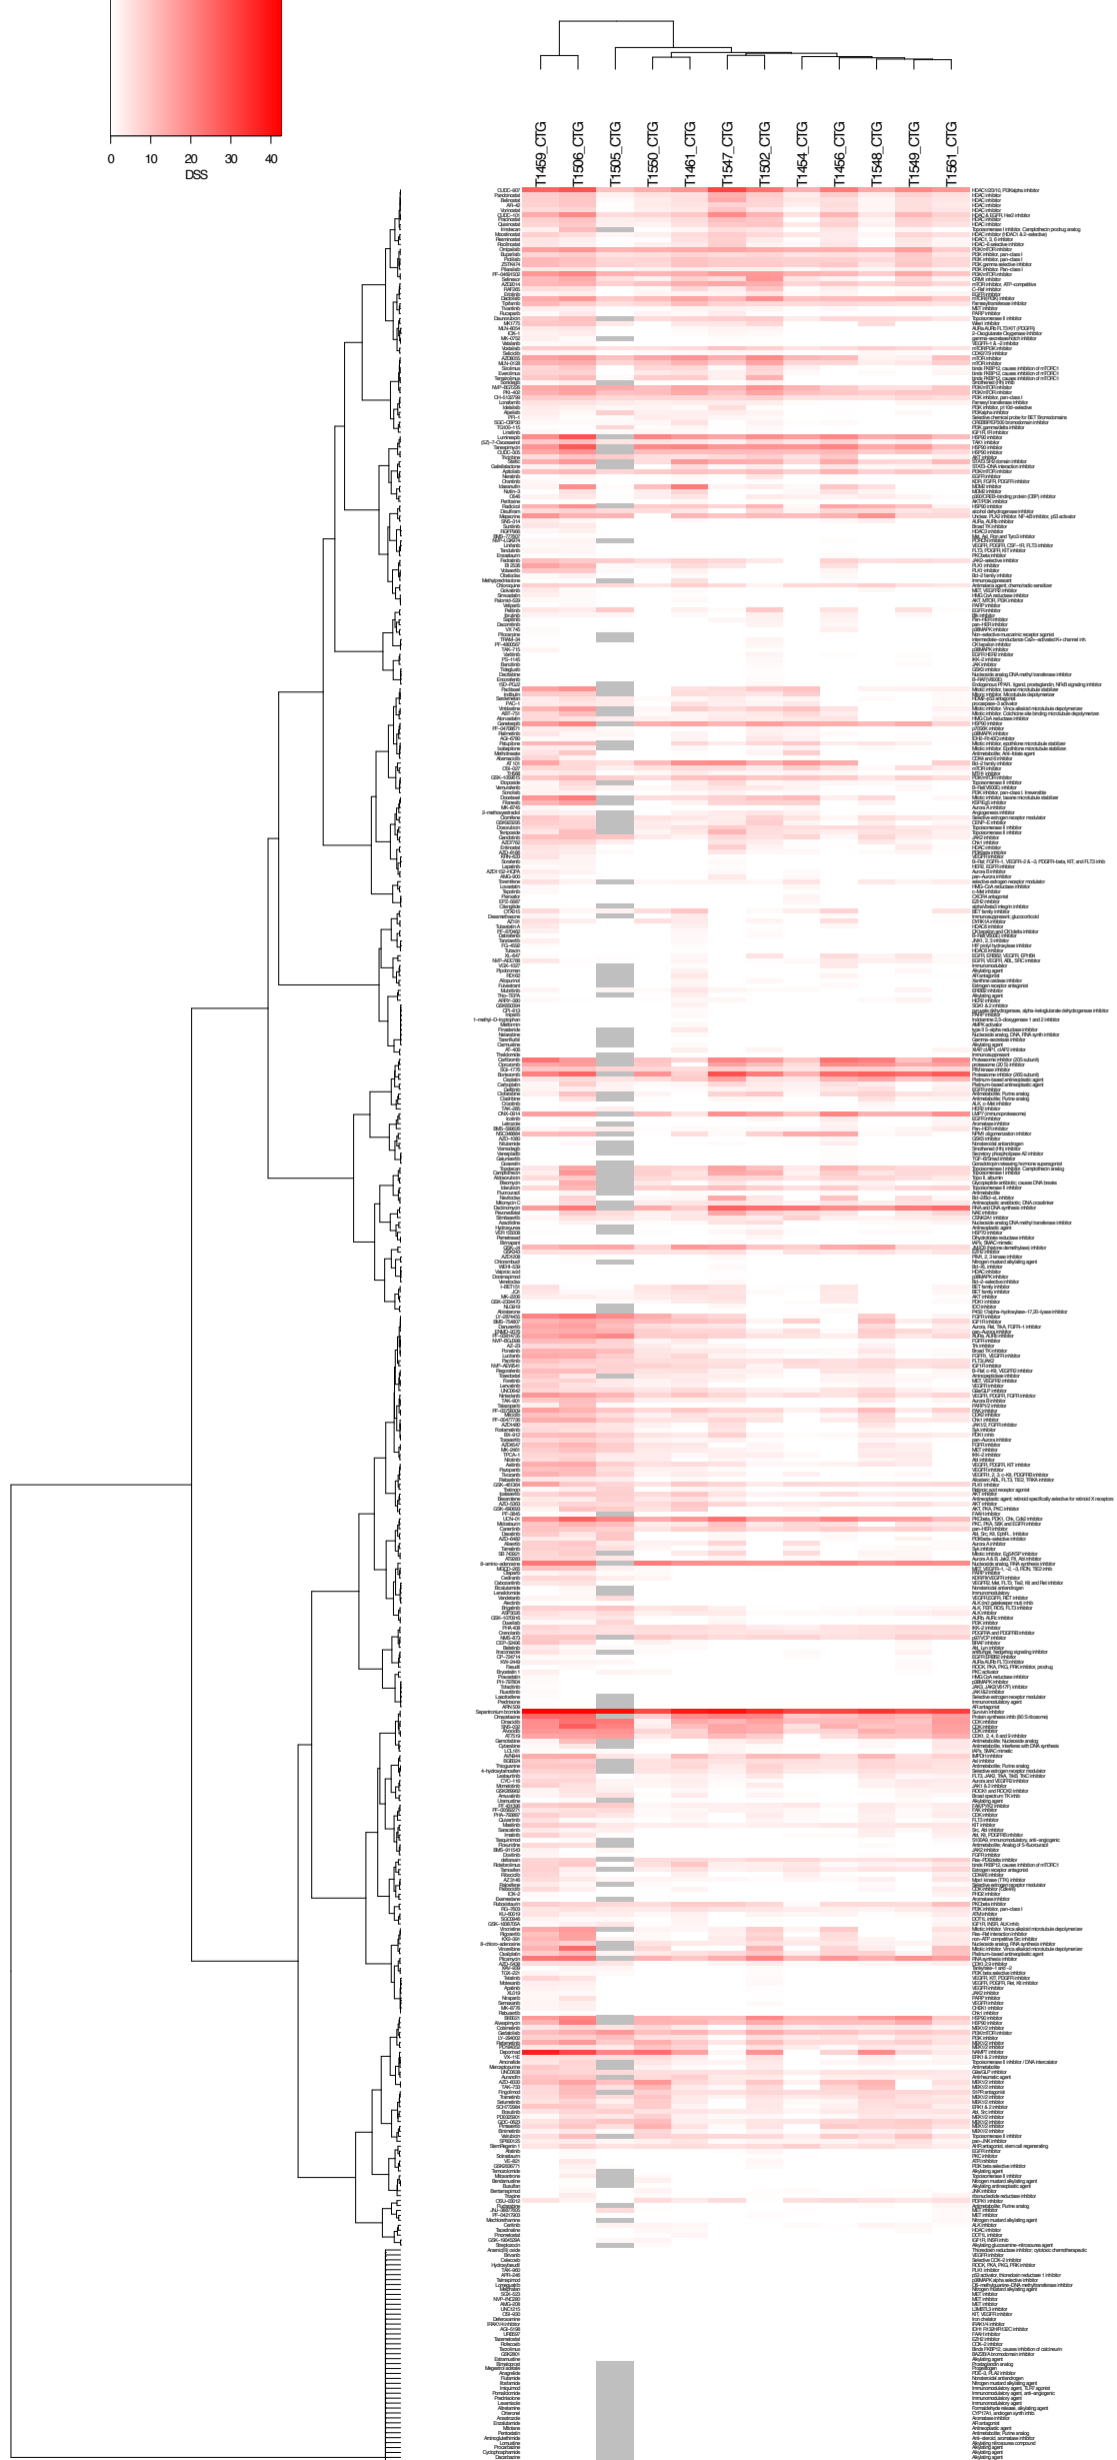

Drugs

Samples
