# Supplementary material for: Intertumoral heterogeneity in patient-specific drug sensitivities in treatment-naïve glioblastoma
Source: BMC Cancer. 2019 Jun 25;19:628. doi: 10.1186/s12885-019-5861-4 (PMC6593575; doi:10.1186/s12885-019-5861-4)

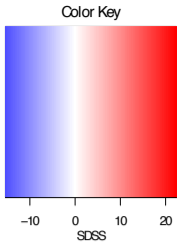

CTG sDSS Heatmap Based on Average of 12 Glioma Samples  
(rdist=spearman and rclust = ward, cdist = manhattan and cclust = ward)

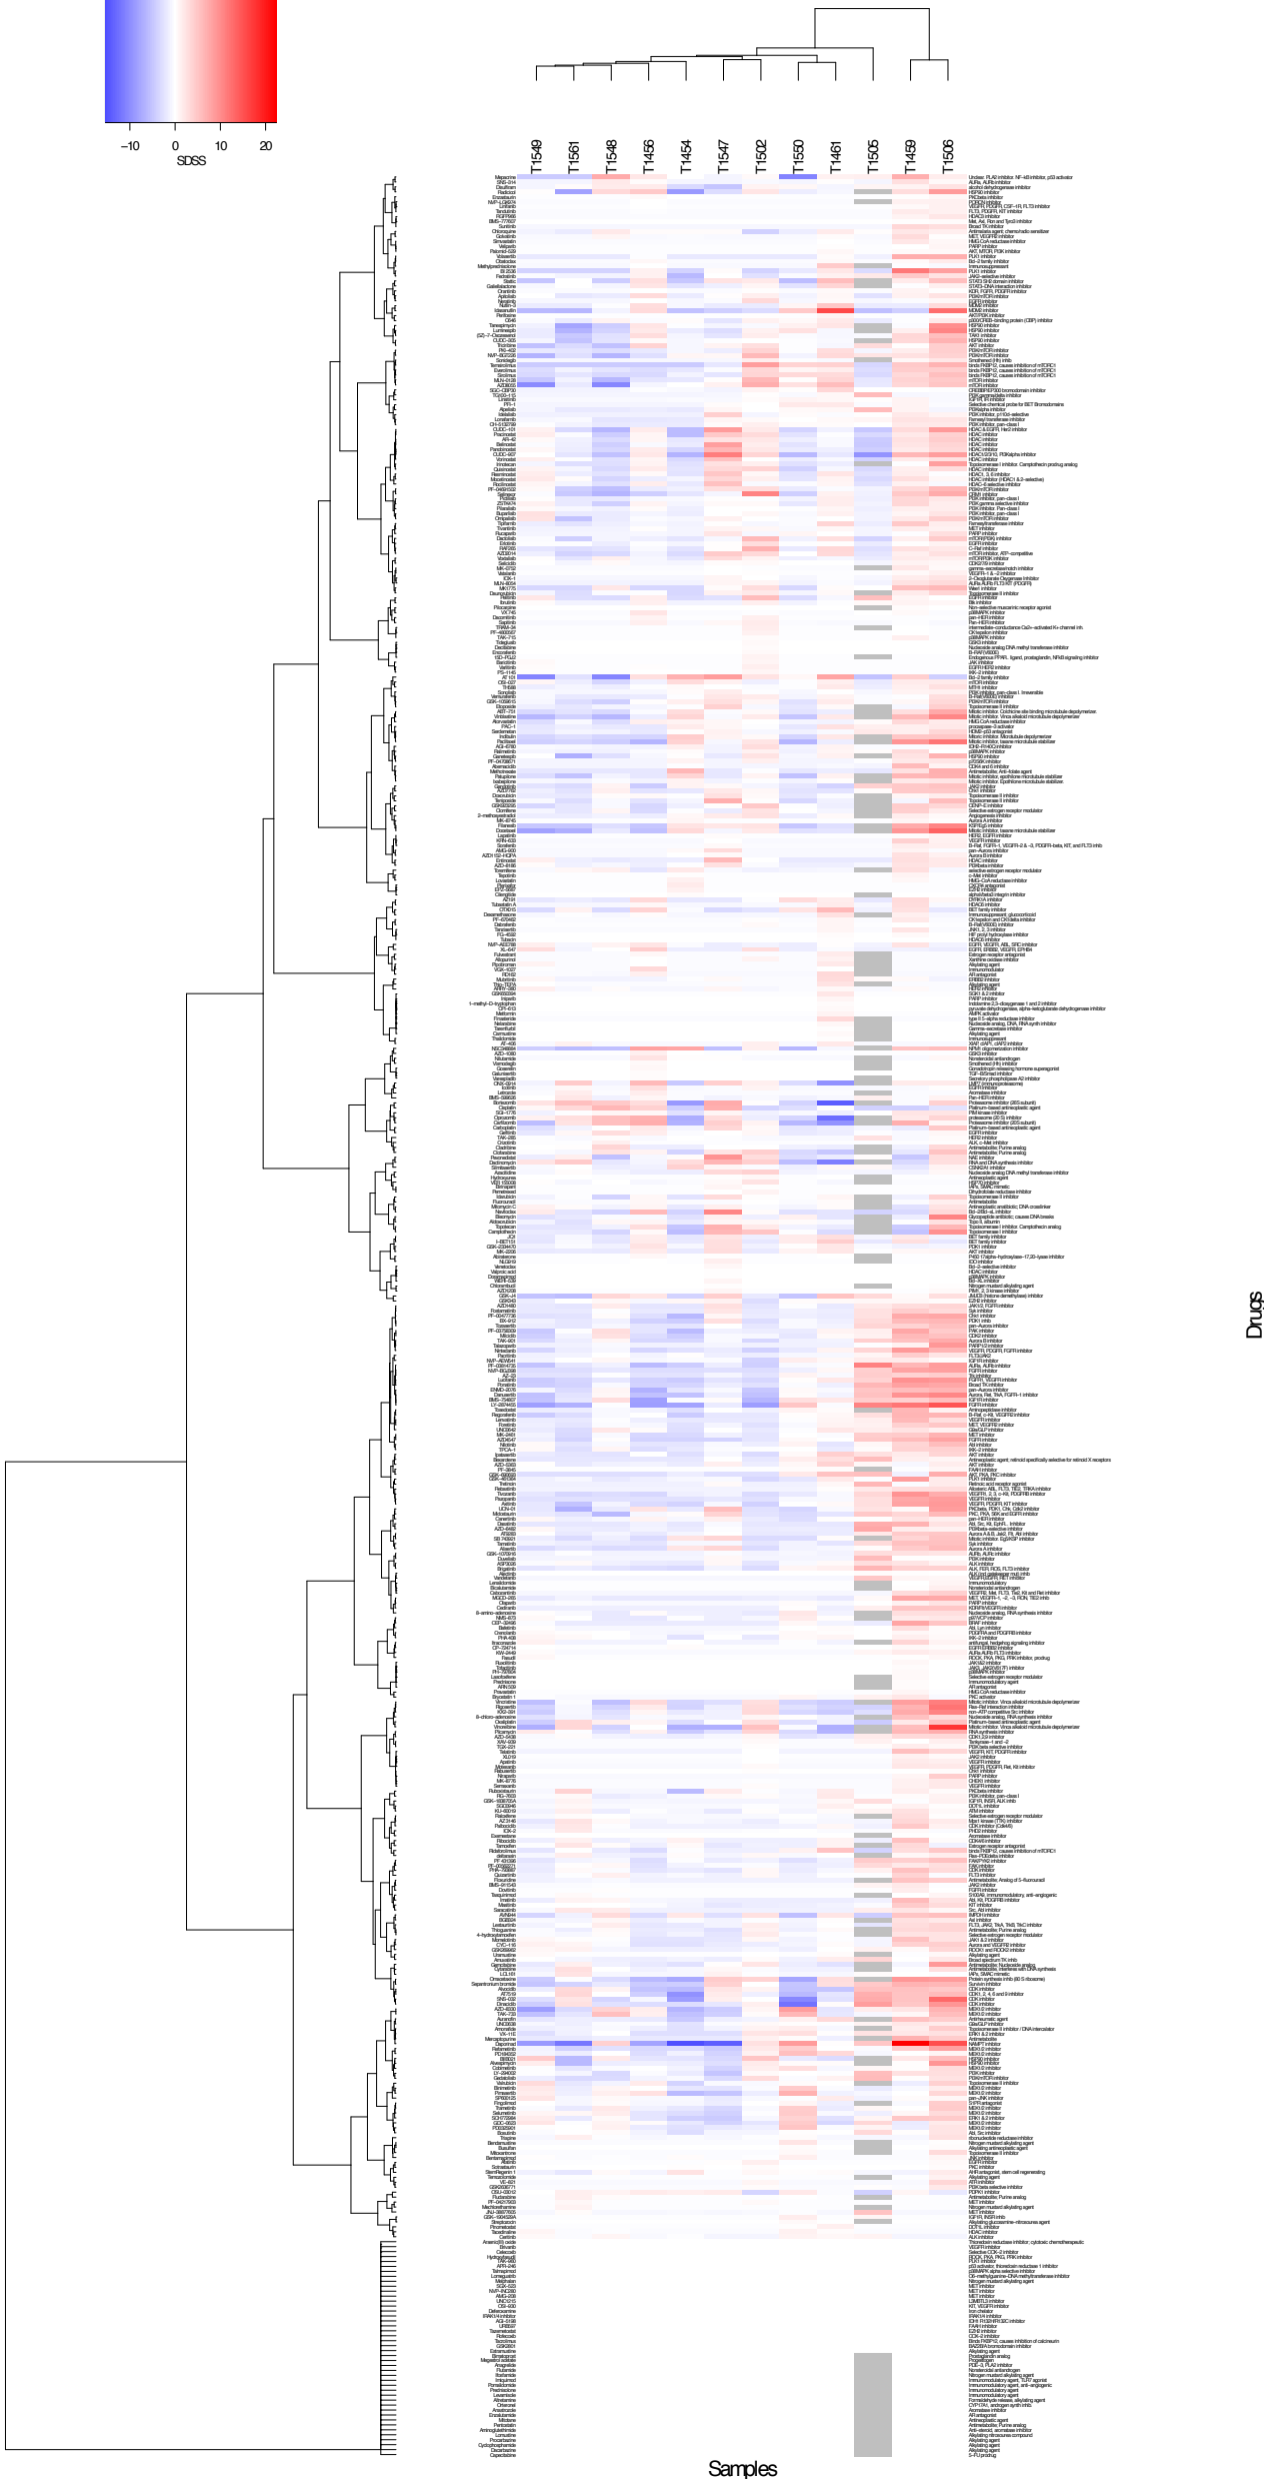

Supplement: Supplementary file 9 — Heat map of sDSS in all drugs. Heat map and unsupervised hierarchical clustering of relative effects (sDSS) of the entire drug collection. Gray: failed/missing drug response. (PDF 148 kb) [file 12885_2019_5861_MOESM9_ESM.pdf]
